# Supplementary material for: The Effects of Edaphic Factors on Riparian Plants in the Middle and Lower Reaches of the Hanjiang River, China
Source: MDPI journal article supplement (doi:10.3390/plants11040531), 2022-02-16
Supplement: s1 [file s1]

## Supplementary Materials

**Table S1.** The list of herb species over the two study periods in the middle and lower reaches of the Hanjiang River.

| No. | Families         | Genera             | Species                                                             | Hy | M | Mp | X | P | A |
|-----|------------------|--------------------|---------------------------------------------------------------------|----|---|----|---|---|---|
| 1   | Pteridaceae      | <i>Pteris</i>      | <i>Pteris multifida</i> Poir.                                       |    | ✓ |    |   | ✓ |   |
| 2   | Equisetaceae     | <i>Equisetum</i>   | <i>Equisetum ramosissimum</i> Desf.                                 |    | ✓ |    |   | ✓ |   |
| 3   | Nephrolepidaceae | <i>Nephrolepis</i> | <i>Nephrolepis auriculata</i> (L. ) Trimen                          |    | ✓ |    |   | ✓ |   |
| 4   | Salviniaceae     | <i>Salvinia</i>    | <i>Salvinia natans</i> (L.) All.                                    | ✓  |   |    |   | ✓ |   |
| 5   | Azollaceae       | <i>Azolla</i>      | <i>Azolla pinnata</i> subsp. asiatica R. M. K. Saunders & K. Fowler | ✓  |   |    |   | ✓ |   |
| 6   | Typhaceae        | <i>Typha</i>       | <i>Typha angustifolia</i> Linn.                                     | ✓  |   |    |   | ✓ |   |
| 7   | Potamogetonaceae | <i>Potamogeton</i> | <i>Potamogeton crispus</i> Linn.                                    | ✓  |   |    |   | ✓ |   |
| 8   |                  |                    | <i>Potamogeton maackianus</i> A. Bennett                            | ✓  |   |    |   | ✓ |   |
| 9   |                  |                    | <i>Potamogeton wrightii</i> Morong                                  | ✓  |   |    |   | ✓ |   |
| 10  |                  |                    | <i>Potamogeton pectinatus</i> Linn.                                 | ✓  |   |    |   | ✓ |   |
| 11  |                  |                    | <i>Potamogeton perfoliatus</i> Linn.                                | ✓  |   |    |   | ✓ |   |
| 12  | Hydrocharitaceae | <i>Elodea</i>      | <i>Elodea canadensis</i>                                            | ✓  |   |    |   | ✓ |   |
| 13  |                  | <i>Hydrilla</i>    | <i>Hydrilla verticillata</i> (L. f.) Royle                          | ✓  |   |    |   | ✓ |   |
| 14  |                  | <i>Hydrocharis</i> | <i>Hydrocharis dubia</i> (Bl.) Backer                               | ✓  |   |    |   | ✓ |   |
| 15  |                  | <i>Vallisneria</i> | <i>Vallisneria natans</i> (Lour.) Hara                              | ✓  |   |    |   | ✓ |   |
| 16  | Poaceae          | <i>Alopecurus</i>  | <i>Alopecurus aequalis</i> Sobol.                                   |    | ✓ |    |   |   | ✓ |
| 17  |                  | <i>Arthraxon</i>   | <i>Arthraxon hispidus</i>                                           |    | ✓ |    |   |   | ✓ |
| 18  |                  | <i>Bromus</i>      | <i>Bromus japonicus</i> Thunb. ex Murr.                             |    |   | ✓  |   |   | ✓ |
| 19  |                  | <i>Cynodon</i>     | <i>Cynodon dactylon</i> (L.) Pers.                                  |    |   | ✓  |   | ✓ |   |
| 20  |                  | <i>Digitaria</i>   | <i>Digitaria sanguinalis</i> (L.) Scop.                             |    |   | ✓  |   |   | ✓ |
| 21  |                  | <i>Echinochloa</i> | <i>Echinochloa caudata</i> Roshev.                                  |    | ✓ |    |   |   | ✓ |
| 22  |                  |                    | <i>Echinochloa colonum</i> (L. ) Link                               |    | ✓ |    |   |   | ✓ |
| 23  |                  | <i>Eleusine</i>    | <i>Eleusine indica</i> (L.) Gaertn.                                 |    |   |    | ✓ |   | ✓ |
| 24  |                  | <i>Hemarthria</i>  | <i>Hemarthria sibirica</i> (Gandoger) Ohwi                          |    | ✓ |    |   | ✓ |   |
| 25  |                  | <i>Imperata</i>    | <i>Imperata cylindrica</i> (Linn.) Beauv.                           |    |   |    | ✓ | ✓ |   |
| 26  |                  | <i>Isachne</i>     | <i>Isachne globosa</i> (Thunb.) Kuntze                              |    |   | ✓  |   | ✓ |   |
| 27  |                  | <i>Leersia</i>     | <i>Leersia hexandra</i> Swartz.                                     |    | ✓ |    |   | ✓ |   |
| 28  |                  | <i>Lolium</i>      | <i>Lolium perenne</i> L.                                            |    | ✓ |    |   | ✓ |   |
| 29  |                  | <i>Milium</i>      | <i>Milium effusum</i> L.                                            |    | ✓ |    |   | ✓ |   |
| 30  |                  | <i>Paspalum</i>    | <i>Paspalum distichum</i> (Michx.) Scribn.                          |    | ✓ |    |   | ✓ |   |
| 31  |                  | <i>Pennisetum</i>  | <i>Pennisetum alopecuroides</i> (L. ) Spreng.                       |    |   | ✓  |   | ✓ |   |
| 32  |                  | <i>Phalaris</i>    | <i>Phalaris arundinacea</i> Linn.                                   |    | ✓ |    |   | ✓ |   |
| 33  |                  | <i>Phragmites</i>  | <i>Phragmites australis</i> (Cav.) Trin. ex Steud.                  |    | ✓ |    |   | ✓ |   |
| 34  |                  | <i>Polypogon</i>   | <i>Polypogon fugax</i> Nees ex Steud.                               |    | ✓ |    |   |   | ✓ |
| 35  |                  | <i>Saccharum</i>   | <i>Saccharum arundinaceum</i> Retz.                                 |    |   |    | ✓ | ✓ |   |
| 36  |                  | <i>Setaria</i>     | <i>Setaria viridis</i> (L.) Beauv.                                  |    |   |    | ✓ |   | ✓ |
| 37  |                  | <i>Triarrhena</i>  | <i>Triarrhena lutarioriparia</i> L. Liou var. gongchai L.Liu        |    |   |    | ✓ | ✓ |   |
| 38  |                  |                    | <i>Triarrhena sacchariflora</i> (Maxim.) Nakai                      |    | ✓ |    |   | ✓ |   |
| 39  |                  | <i>Zizania</i>     | <i>Zizania latifolia</i> (Turcz) Hand.-Mazz.                        | ✓  |   |    |   | ✓ |   |
| 40  | Cyperaceae       | <i>Pycnus</i>      | <i>Pycnus sanguinolentus</i> (Vahl) Nees                            |    | ✓ |    |   |   | ✓ |

|    |                  |                      |                                                                     |   |   |   |
|----|------------------|----------------------|---------------------------------------------------------------------|---|---|---|
| 41 |                  | <i>Carex</i>         | <i>Carex brachyathera</i> Ohwi                                      |   | ✓ | ✓ |
| 42 |                  |                      | <i>Carex neurocarpa</i> Maxim.                                      | ✓ |   | ✓ |
| 43 |                  | <i>Cyperus</i>       | <i>Cyperus iria</i> L.                                              | ✓ |   | ✓ |
| 44 |                  |                      | <i>Cyperus pilosus</i> Vahl                                         | ✓ |   | ✓ |
| 45 |                  |                      | <i>Cyperus rotundus</i> Linn.                                       | ✓ | ✓ |   |
| 46 |                  | <i>Fimbristylis</i>  | <i>Fimbristylis squarrosa</i> var. <i>esquarrosa</i> Makino         | ✓ |   | ✓ |
| 47 |                  | <i>Eleocharis</i>    | <i>Eleocharis dulcis</i> (N. L. Burman) Trinius ex Henschel         | ✓ | ✓ |   |
| 48 |                  |                      | <i>Eleocharis yokoscensis</i> (Franch. et Savat.) Tang & F. T. Wang | ✓ |   | ✓ |
| 49 |                  | <i>Juncellus</i>     | <i>Cyperus serotinus</i> Rottb.                                     | ✓ | ✓ |   |
| 50 |                  | <i>Kyllinga</i>      | <i>Kyllinga brevifolia</i> Rottb.                                   | ✓ |   | ✓ |
| 51 |                  | <i>Lipocarpa</i>     | <i>Lipocarpa chinensis</i> (Osbeck) Kern                            | ✓ |   | ✓ |
| 52 |                  | <i>Scirpus</i>       | <i>Scirpus planiculmis</i> Fr. Schmidt                              | ✓ | ✓ |   |
| 53 |                  |                      | <i>Scirpus triangulatus</i> Roxb.                                   | ✓ | ✓ |   |
| 54 |                  |                      | <i>Scirpus triqueter</i> Linn.                                      | ✓ | ✓ |   |
| 55 | Araceae          | <i>Acorus</i>        | <i>Acorus calamus</i> Linn.                                         | ✓ | ✓ |   |
| 56 | Lemnaceae        | <i>Lemna</i>         | <i>Lemna minor</i> L.                                               | ✓ |   | ✓ |
| 57 | Commelinaceae    | <i>Commelina</i>     | <i>Commelina communis</i> Linn.                                     | ✓ |   | ✓ |
| 58 | Pontederiaceae   | <i>Eichhornia</i>    | <i>Eichhornia crassipes</i> (Mart.) Solms <sup>△</sup>              | ✓ |   | ✓ |
| 59 | Juncaceae        | <i>Juncus</i>        | <i>Juncus effusus</i> Linn.                                         | ✓ | ✓ |   |
| 60 |                  |                      | <i>Juncus prismatocarpus</i> R. Br.                                 | ✓ | ✓ |   |
| 61 | Saururaceae      | <i>Houttuynia</i>    | <i>Houttuynia cordata</i> Thunb.                                    | ✓ | ✓ |   |
| 62 | Moraceae         | <i>Humulus</i>       | <i>Humulus scandens</i> (Lour.) Merr.                               |   | ✓ | ✓ |
| 63 | Polygonaceae     | <i>Polygonum</i>     | <i>Polygonum aviculare</i> L.                                       |   | ✓ | ✓ |
| 64 |                  |                      | <i>Polygonum criopolitanum</i> Hance                                |   | ✓ | ✓ |
| 65 |                  |                      | <i>Polygonum hydropiper</i> L.                                      | ✓ |   | ✓ |
| 66 |                  |                      | <i>Polygonum lapathifolium</i> L.                                   | ✓ |   | ✓ |
| 67 |                  |                      | <i>Polygonum perfoliatum</i> L.                                     |   | ✓ | ✓ |
| 68 |                  | <i>Rumex</i>         | <i>Rumex dentatus</i> L.                                            | ✓ |   | ✓ |
| 69 | Chenopodiaceae   | <i>Chenopodium</i>   | <i>Chenopodium album</i> Linn.                                      |   | ✓ | ✓ |
| 70 |                  |                      | <i>Chenopodium ambrosioides</i> Linn.                               |   | ✓ | ✓ |
| 71 | Amaranthaceae    | <i>Achyranthes</i>   | <i>Achyranthes bidentata</i> Blume                                  |   | ✓ | ✓ |
| 72 |                  | <i>Alternanthera</i> | <i>Alternanthera philoxeroides</i> (Mart.) Griseb. <sup>△</sup>     | ✓ |   | ✓ |
| 73 |                  |                      | <i>Alternanthera sessilis</i> (Linn.) DC.                           | ✓ |   | ✓ |
| 74 |                  | <i>Amaranthus</i>    | <i>Amaranthus spinosus</i>                                          |   | ✓ | ✓ |
| 75 |                  | <i>Celosia</i>       | <i>Celosia argentea</i> L.                                          |   | ✓ | ✓ |
| 76 | Phytolaccaceae   | <i>Phytolacca</i>    | <i>Phytolacca acinosa</i> Roxb.                                     |   | ✓ | ✓ |
| 77 | Aizoaceae        | <i>Mollugo</i>       | <i>Mollugo stricta</i> L.                                           | ✓ |   | ✓ |
| 78 | Portulacaceae    | <i>Portulaca</i>     | <i>Portulaca oleracea</i> L.                                        | ✓ |   | ✓ |
| 79 | caryophyllaceae  | <i>Arenaria</i>      | <i>Arenaria serpyllifolia</i> L.                                    | ✓ |   | ✓ |
| 80 |                  | <i>Myosoton</i>      | <i>Myosoton aquaticum</i> (L.) Moench                               | ✓ |   | ✓ |
| 81 | Ceratophyllaceae | <i>Ceratophyllum</i> | <i>Ceratophyllum demersum</i> Linn.                                 | ✓ |   | ✓ |
| 82 | Ranunculaceae    | <i>Clematis</i>      | <i>Clematis florida</i> Thunb.                                      | ✓ | ✓ |   |
| 83 |                  | <i>Ranunculus</i>    | <i>Ranunculus sieboldii</i> Miq.                                    | ✓ |   | ✓ |
| 84 |                  |                      | <i>Ranunculus sceleratus</i> Linn.                                  | ✓ |   | ✓ |

|     |                  |                      |                                                                        |   |   |   |
|-----|------------------|----------------------|------------------------------------------------------------------------|---|---|---|
| 85  | Cruciferae       | <i>Cardamine</i>     | <i>Cardamine hirsuta</i> L.                                            | ✓ |   | ✓ |
| 86  |                  | <i>Lepidium</i>      | <i>Lepidium apetalum</i>                                               | ✓ |   | ✓ |
| 87  |                  | <i>Rorippa</i>       | <i>Rorippa globosa</i> (Turcz.) Hayek                                  | ✓ |   | ✓ |
| 88  |                  |                      | <i>Rorippa indica</i> (Linn.) Hiern                                    | ✓ |   | ✓ |
| 89  | Crassulaceae     | <i>Sedum</i>         | <i>Sedum sarmentosum</i> Bunge                                         | ✓ |   | ✓ |
| 90  | Rosaceae         | <i>Duchesnea</i>     | <i>Duchesnea indica</i> (Andr.) Focke                                  | ✓ |   | ✓ |
| 91  |                  | <i>Potentilla</i>    | <i>Potentilla discolor</i> Bge                                         |   | ✓ | ✓ |
| 92  |                  |                      | <i>Potentilla fulgens</i> Wall. ex Hook.                               |   | ✓ | ✓ |
| 93  | Leguminosae      | <i>Glycine</i>       | <i>Glycine soja</i> Sieb. et Zucc.                                     |   | ✓ | ✓ |
| 94  |                  | <i>Melilotus</i>     | <i>Melilotus officinalis</i> (L.) Pall.                                |   | ✓ | ✓ |
| 95  |                  | <i>Trifolium</i>     | <i>Trifolium repens</i> <sup>△</sup>                                   |   | ✓ | ✓ |
| 96  |                  | <i>Vicia</i>         | <i>Vicia hirsuta</i> (L.) S. F. Gray                                   |   | ✓ | ✓ |
| 97  |                  |                      | <i>Vicia sepium</i>                                                    |   | ✓ | ✓ |
| 98  | Oxalidaceae      | <i>Oxalis</i>        | <i>Oxalis corniculata</i> Linn.                                        | ✓ |   | ✓ |
| 99  | Geraniaceae      | <i>Geranium</i>      | <i>Geranium carolinianum</i> L.                                        |   | ✓ | ✓ |
| 100 | Euphorbiaceae    | <i>Acalypha</i>      | <i>Acalypha australis</i> L.                                           | ✓ |   | ✓ |
| 101 |                  | <i>Euphorbia</i>     | <i>Euphorbia humifusa</i> Willd.                                       | ✓ |   | ✓ |
| 102 | Vitaceae         | <i>Cayratia</i>      | <i>Cayratia japonica</i> (Thunb.) Gagnep.                              |   | ✓ | ✓ |
| 103 | Violaceae        | <i>Viola</i>         | <i>Viola prioantha</i> Bunge                                           | ✓ |   | ✓ |
| 104 | Trapaceae        | <i>Trapa</i>         | <i>Trapa incisa</i> Sieb. et Zucc.                                     | ✓ |   | ✓ |
| 105 | Onagraceae       | <i>Ludwigia</i>      | <i>Ludwigia hyssopifolia</i> (G. Don) Exell                            | ✓ |   | ✓ |
| 106 |                  | <i>Oenothera</i>     | <i>Oenothera glazioviana</i> Mich.                                     |   | ✓ | ✓ |
| 107 | Haloragidaceae   | <i>Myriophyllum</i>  | <i>Myriophyllum spicatum</i> L.                                        | ✓ |   | ✓ |
| 108 | Umbelliferae     | <i>Daucus</i>        | <i>Daucus carota</i>                                                   |   | ✓ | ✓ |
| 109 |                  | <i>Hydrocotyle</i>   | <i>Hydrocotyle sibthorpioides</i> Lam.                                 | ✓ |   | ✓ |
| 110 |                  | <i>Oenanthe</i>      | <i>Oenanthe javanica</i> (Bl.) DC.                                     | ✓ |   | ✓ |
| 111 | Primulaceae      | <i>Penthorum</i>     | <i>Penthorum chinense</i> Pursh                                        | ✓ |   | ✓ |
| 112 | Gentianaceae     | <i>Nymphoides</i>    | <i>Nymphoides peltatum</i> (Gmel.) O. Kuntze                           | ✓ |   | ✓ |
| 113 | Asclepiadaceae   | <i>Metaplexis</i>    | <i>Metaplexis japonica</i> (Thunb.) Makino                             |   | ✓ | ✓ |
| 114 | Convolvulaceae   | <i>Calystegia</i>    | <i>Calystegia hederacea</i> Wall.                                      |   | ✓ | ✓ |
| 115 | Boraginaceae     | <i>Trigonotis</i>    | <i>Trigonotis peduncularis</i> (Trev.) Benth. ex Baker et Moore        | ✓ |   | ✓ |
| 116 | Verbenaceae      | <i>Phyla</i>         | <i>Phyla nodiflora</i>                                                 | ✓ |   | ✓ |
| 117 | Labiatae         | <i>Elsholtzia</i>    | <i>Elsholtzia cypriani</i> (Pavol.) C. Y. Wu et S. Chow                | ✓ |   | ✓ |
| 118 |                  | <i>Leonurus</i>      | <i>Leonurus artemisis</i> (Lour.) S. Y. Hu                             | ✓ |   | ✓ |
| 119 |                  | <i>Salvia</i>        | <i>Salvia plebeia</i> R. Br.                                           | ✓ |   | ✓ |
| 120 |                  | <i>Scutellaria</i>   | <i>Scutellaria barbata</i>                                             | ✓ |   | ✓ |
| 121 |                  | <i>Stachys</i>       | <i>Stachys japonica</i>                                                | ✓ |   | ✓ |
| 122 | Solanaceae       | <i>Solanum</i>       | <i>Solanum nigrum</i> L.                                               |   | ✓ | ✓ |
| 123 | Scrophulariaceae | <i>Mazus</i>         | <i>Mazus japonicus</i> (Thunb.) O. Kuntze                              | ✓ |   | ✓ |
| 124 |                  | <i>Veronica</i>      | <i>Veronica polita</i> Fries                                           | ✓ |   | ✓ |
| 125 |                  |                      | <i>Veronica undulata</i> Wall.                                         | ✓ |   | ✓ |
| 126 | Acanthaceae      | <i>Rostellularia</i> | <i>Rostellularia procumbens</i> (L.) Nees                              | ✓ |   | ✓ |
| 127 | Plantaginaceae   | <i>Plantago</i>      | <i>Plantago asiatica</i> L.                                            | ✓ |   | ✓ |
| 128 | Rubiaceae        | <i>Galium</i>        | <i>Galium aparine</i> Linn. var. <i>tenerum</i> (Gren. et Godr.) Rchb. | ✓ |   | ✓ |

|       |                |                     |                                              |    |    |    |    |    |    |
|-------|----------------|---------------------|----------------------------------------------|----|----|----|----|----|----|
| 129   |                | <i>Paederia</i>     | <i>Paederia scandens</i> (Lour.) Merr.       |    | ✓  |    |    | ✓  |    |
| 130   |                | <i>Rubia</i>        | <i>Rubia cordifolia</i> L.                   |    | ✓  |    |    | ✓  |    |
| 131   | Caprifoliaceae | <i>Sambucus</i>     | <i>Sambucus javanica</i> Blume               |    | ✓  |    |    | ✓  |    |
| 132   | Cucurbitaceae  | <i>Actinostemma</i> | <i>Actinostemma lobatum</i>                  | ✓  |    |    |    |    | ✓  |
| 133   |                | <i>Zehneria</i>     | <i>Zehneria indica</i> (Lour.) Keraudren     |    | ✓  |    |    |    | ✓  |
| 134   | Campanulaceae  | <i>Lobelia</i>      | <i>Lobelia chinensis</i> Lour.               | ✓  |    |    |    | ✓  |    |
| 135   | Asteraceae     | <i>Lactuca</i>      | <i>Lactuca serriola</i>                      |    | ✓  |    |    |    | ✓  |
| 136   |                | <i>Artemisia</i>    | <i>Artemisia annua</i>                       |    | ✓  |    |    |    | ✓  |
| 137   |                |                     | <i>Artemisia argyi</i> Lévl. et Van.         |    |    |    | ✓  |    | ✓  |
| 138   |                |                     | <i>Artemisia selengensis</i> Turcz. ex Bess. | ✓  |    |    |    | ✓  |    |
| 139   |                | <i>Aster</i>        | <i>Aster subulatus</i> Michx.                | ✓  |    |    |    | ✓  |    |
| 140   |                | <i>Bidens</i>       | <i>Bidens pilosa</i> L.                      | ✓  |    |    |    |    | ✓  |
| 141   |                | <i>Carduus</i>      | <i>Carduus acanthoides</i> Linn.             |    | ✓  |    |    |    | ✓  |
| 142   |                | <i>Cirsium</i>      | <i>Cirsium setosum</i> (Willd.) MB.          |    | ✓  |    |    |    | ✓  |
| 143   |                | <i>Conyza</i> Less. | <i>Conyza canadensis</i> (L.) Cronq.         |    |    |    | ✓  |    | ✓  |
| 144   |                | <i>Dendranthema</i> | <i>Dendranthema indicum</i> (L.) Des Moul.   |    |    |    | ✓  | ✓  |    |
| 145   |                | <i>Eclipta</i>      | <i>Eclipta prostrata</i> (L.) L.             | ✓  |    |    |    |    | ✓  |
| 146   |                | <i>Erigeron</i>     | <i>Erigeron annuus</i> (L.) Pers.            |    | ✓  |    |    |    | ✓  |
| 147   |                | <i>Gnaphalium</i>   | <i>Gnaphalium affine</i> D. Don.             | ✓  |    |    |    |    | ✓  |
| 148   |                | <i>Hemistepta</i>   | <i>Hemistepta lyrata</i> (Bunge.) Bunge      | ✓  |    |    |    |    | ✓  |
| 149   |                | <i>Kalimeris</i>    | <i>Kalimeris indica</i> (L.) Sch.-Bip.       |    | ✓  |    |    | ✓  |    |
| 150   |                | <i>Ixeris</i>       | <i>Ixeris polycephala</i> Cass.              |    | ✓  |    |    |    | ✓  |
| 151   |                | <i>Lactuca</i>      | <i>Lactuca serriola</i>                      |    | ✓  |    |    |    | ✓  |
| 152   |                | <i>Sheareria</i>    | <i>Sheareria nana</i>                        | ✓  |    |    |    |    | ✓  |
| 153   |                | <i>Siegesbeckia</i> | <i>Siegesbeckia orientalis</i> L.            | ✓  |    |    |    |    | ✓  |
| 154   |                | <i>Xanthium</i>     | <i>Xanthium sibiricum</i> Patrín ex Widder   |    |    |    | ✓  |    | ✓  |
| Total | 55             | 128                 | 154                                          | 20 | 83 | 40 | 11 | 69 | 85 |

<sup>△</sup> Invasive alien species. Hy, hydric species; M, mesic species; Mp, mesophytes; X, xerophytes; P, perennials; A, annuals. The identification keys and nomenclature sources for the studied plants referred to the flora of China (<http://www.iplant.cn/foc/>).

**Table S2.** The community types over the two study periods in the middle and lower reaches of the Hanjiang River.

| September, 2018 |              |    |                |                    |                                                | June, 2019 |                |                    |                                                  |
|-----------------|--------------|----|----------------|--------------------|------------------------------------------------|------------|----------------|--------------------|--------------------------------------------------|
| No.             | Sample sites | T  | No. of Species | Total coverage (%) | Community types                                | T          | No. of Species | Total coverage (%) | Community types                                  |
| 1               | YPT          | b1 | 9±3            | 70.20±16.33        | <i>P. distichum</i> ,<br><i>H. sibirica</i>    | b1         | 15±2           | 99.67±0.47         | <i>P. arundinacea</i> ,<br><i>H. sibirica</i>    |
|                 |              | b2 | 6±2            | 75.67±12.28        | <i>T. lutarioriparia</i>                       | b2         | 9±1            | 87.33±10.87        | <i>T. lutarioriparia</i>                         |
|                 |              | b3 | 3±0            | 75.33±14.61        | <i>I. cylindrica</i>                           | b3         | 6±1            | 94.67±3.09         | <i>I. cylindrica</i>                             |
| 2               | LHH          | z1 | 11±1           | 95.00±0.00         | <i>L. hexandra</i>                             | z1         | 8±0            | 95.67±4.03         | <i>T. angustifolia</i>                           |
|                 |              | z2 | 9±1            | 91.67±2.36         | <i>S. triqueter</i>                            | z2         | 10±2           | 96.67±4.03         | <i>I. cylindrica</i>                             |
|                 |              | z3 | 5±0            | 80.00±8.16         | <i>I. cylindrica</i>                           | z3         | 7±1            | 96.33±2.62         | <i>E. ramosissimum</i>                           |
| 3               | JJZ          | b1 | 3±2            | 71.67±4.71         | <i>P. distichum</i>                            | b1         | 13±1           | 99.00±0.00         | <i>P. distichum</i>                              |
|                 |              | b2 | 3±1            | 88.33±2.36         | <i>P. distichum</i>                            | b2         | 12±2           | 98.67±0.47         | <i>S. triqueter</i>                              |
|                 |              | b3 | 5±1            | 88.33±2.36         | <i>P. distichum</i>                            | b3         | 15±2           | 99.00±0.00         | <i>H. sibthorpioides</i>                         |
|                 |              | b4 | 4±1            | 56.67±10.27        | <i>C. dactylon</i> ,<br><i>S. arundinaceum</i> | b4         | 4±1            | 54.67±3.30         | <i>C. dactylon</i>                               |
| 4               | NH           | z1 | 9±0            | 60.00±4.08         | <i>P. fugax</i> ,<br><i>P. distichum</i>       | z1         | 17±4           | 79.67±3.68         | <i>P. fugax</i>                                  |
|                 |              | z2 | 5±2            | 50.00±24.83        | <i>C. dactylon</i>                             | z2         | 7±2            | 93.67±2.62         | <i>C. dactylon</i>                               |
|                 |              | z3 | 7±1            | 90.00±4.08         | <i>C. dactylon</i>                             | z3         | 9±2            | 97.33±1.70         | <i>C. dactylon</i> ,<br><i>B. japonicus</i>      |
|                 |              | z4 | 7±1            | 73.33±10.27        | <i>I. cylindrica</i>                           | /          | /              | /                  | /                                                |
| 5               | HJZ          | z1 | 7±1            | 25.00±7.07         | <i>P. distichum</i>                            | z1         | 14±2           | 98.67±0.47         | <i>P. distichum</i>                              |
|                 |              | z2 | 7±2            | 46.67±13.12        | <i>P. distichum</i> ,<br><i>E. dulcis</i>      | z2         | 8±2            | 97.67±1.89         | <i>C. dactylon</i>                               |
|                 |              | z3 | 6±1            | 88.33±2.36         | <i>C. dactylon</i>                             | z3         | 12±2           | 99.67±0.47         | <i>C. dactylon</i>                               |
| 6               | SBC          | z1 | 2±1            | 66.25±8.59         | <i>P. distichum</i>                            | z1         | 11±6           | 78.00±15.94        | <i>P. fugax</i>                                  |
|                 |              | z2 | 4±0            | 63.33±20.14        | <i>C. dactylon</i> ,<br><i>P. distichum</i>    | z2         | 14±4           | 97.33±2.36         | <i>P. distichum</i>                              |
|                 |              | z3 | 4±2            | 91.67±4.71         | <i>C. dactylon</i>                             | z3         | 6±0            | 79.00±6.98         | <i>A. argyi</i> ,<br><i>P. arundinacea</i>       |
| 7               | WMD          | z1 | 6±0            | 93.33±2.36         | <i>T. angustifolia</i>                         | z1         | 7±0            | 88.00±11.34        | <i>T. angustifolia</i>                           |
|                 |              | z2 | 10±1           | 88.33±2.36         | <i>L. hexandra</i>                             | z2         | 8±3            | 98.67±0.47         | <i>E. ramosissimum</i> ,<br><i>I. cylindrica</i> |
|                 |              | z3 | 6±2            | 83.33±6.24         | <i>I. cylindrica</i>                           | z3         | 5±0            | 95.67±5.44         | <i>A. argyi</i>                                  |
|                 |              | z4 | 4±0            | 81.67±6.24         | <i>I. cylindrica</i>                           | /          | /              | /                  | /                                                |
| 8               | OM           | z1 | 12±2           | 8.33±2.36          | <i>P. arundinacea</i>                          | z1         | 16±1           | 66.00±2.94         | <i>A. aequalis</i>                               |
|                 |              | z2 | 3±0            | 93.33±2.36         | <i>P. arundinacea</i>                          | z2         | 11±2           | 97.33±0.47         | <i>P. arundinacea</i>                            |
|                 |              | z3 | 4±1            | 88.75±6.50         | <i>C. dactylon</i>                             | z3         | 5±1            | 43.33±1.25         | <i>B. japonicus</i>                              |
|                 |              | z4 | 6±1            | 60.00±20.41        | <i>S. arundinaceum</i> ,<br><i>C. dactylon</i> | z4         | 4±1            | 51.33±5.31         | <i>A. argyi</i> ,<br><i>S. arundinaceum</i>      |
| 9               | YC           | b1 | 6±1            | 43.33±15.46        | <i>P. distichum</i> ,<br><i>C. dactylon</i>    | b1         | 15±2           | 84.00±2.94         | <i>P. distichum</i>                              |

|    |     |    |      |             |                                                |    |      |             |                                                 |
|----|-----|----|------|-------------|------------------------------------------------|----|------|-------------|-------------------------------------------------|
| 10 | ZX  | b2 | 3±1  | 90.00±0.00  | <i>P. distichum</i>                            | b2 | 6±2  | 95.33±4.50  | <i>C. dactylon</i> ,<br><i>P. distichum</i>     |
|    |     | b3 | 5±1  | 73.33±2.36  | <i>C. dactylon</i> ,<br><i>S. arundinaceum</i> | b3 | 4±1  | 95.00±5.66  | <i>B. japonicus</i> ,<br><i>C. dactylon</i>     |
|    |     | z1 | 10±2 | 28.33±25.93 | <i>C. dactylon</i>                             | z1 | 14±1 | 98.33±1.70  | <i>P. distichum</i>                             |
|    |     | z2 | 3±2  | 73.33±20.95 | <i>P. australis</i>                            | z2 | 3±2  | 91.67±2.87  | <i>P. australis</i>                             |
|    |     | z3 | 3±1  | 61.67±9.43  | <i>P. australis</i>                            | z3 | 5±1  | 76.67±15.92 | <i>C. dactylon</i>                              |
|    |     | z3 | 3±1  | 61.67±9.43  | <i>P. australis</i>                            | z3 | 5±1  | 76.67±15.92 | <i>C. dactylon</i>                              |
| 11 | SPZ | z1 | 12±1 | 56.67±2.36  | <i>P. australis</i> ,<br><i>C. dactylon</i>    | z1 | 10±3 | 98.33±0.94  | <i>C. dactylon</i>                              |
| 12 | ZK  | z2 | 1±0  | 63.33±23.92 | <i>P. australis</i>                            | z2 | 9±2  | 83.00±16.93 | <i>P. australis</i>                             |
|    |     | b1 | 6±2  | 46.67±6.24  | <i>C. dactylon</i> ,<br><i>P. distichum</i>    | b1 | 8±3  | 58.67±18.80 | <i>C. dactylon</i>                              |
|    |     | b2 | 5±1  | 76.67±2.36  | <i>P. australis</i> ,<br><i>P. arundinacea</i> | b2 | 5±1  | 82.67±8.99  | <i>P. arundinacea</i> ,<br><i>C. dactylon</i>   |
|    |     | b3 | 4±1  | 86.67±4.71  | <i>C. dactylon</i>                             | b3 | 8±1  | 98.33±0.94  | <i>P. distichum</i> ,<br><i>C. dactylon</i>     |
| 13 | YK  | /  | /    | /           | /                                              | b4 | 6±0  | 95.33±2.49  | <i>M. officinalis</i>                           |
|    |     | b1 | 12±5 | 50.00±10.80 | <i>C. dactylon</i>                             | b1 | 11±0 | 76.67±4.92  | <i>C. canadensis</i>                            |
|    |     | b2 | 13±2 | 65.00±18.71 | <i>C. dactylon</i>                             | b2 | 6±1  | 98.67±0.47  | <i>P. arundinacea</i> ,<br><i>C. canadensis</i> |
|    |     | b3 | 7±1  | 66.67±9.43  | <i>C. dactylon</i>                             | b3 | 9±1  | 91.00±2.83  | <i>C. dactylon</i>                              |
| 14 | GYT | b1 | 11±4 | 72.67±21.08 | <i>P. arundinacea</i>                          | b1 | 9±3  | 98.33±0.94  | <i>P. arundinacea</i> ,<br><i>C. canadensis</i> |
|    |     | b2 | 6±3  | 91.67±2.36  | <i>P. distichum</i> ,<br><i>P. australis</i>   | b2 | 14±2 | 93.33±3.30  | <i>C. dactylon</i>                              |
|    |     | b3 | 11±2 | 90.00±0.00  | <i>C. dactylon</i>                             | /  | /    | /           | /                                               |
|    |     | b3 | 11±2 | 90.00±0.00  | <i>C. dactylon</i>                             | /  | /    | /           | /                                               |

T, transect; YPT, Yangpitan; LHH, Lihuahu; JJZ, Jiangjiazhou; NH, Nanhu; HJZ, Hujiazhou; SBC, Shanbiancun; WMD, Wumingdao; OM, Oumiao; YC, Yicheng; ZX, Zhongxiang; SPZ, Shipaizhen; ZK, Zekou; YK, Yuekou; GYT, Guanyintang.
